# Supplementary material
Source: PubMed Central journal article supplement (PMC3985938)
Supplement: supp_1.2.E77_original_submission_2012-0032.pdf [file supp_1.2.E77_original_submission_2012-0032.pdf]

1  
2  
3  
4  
5  
6  
7  
8  
9  
10  
11  
12  
13 The impact of Vitamin D status on implantation and clinical pregnancy rates  
14 following *in vitro* fertilization  
15  
16  
17  
18  
19  
20  
21  
22  
23  
24  
25  
26  
27  
28  
29  
30  
31  
32  
33  
34  
35  
36  
37  
38  
39  
40  
41  
42  
43  
44  
45  
46  
47  
48  
49  
50  
51  
52  
53  
54  
55  
56  
57  
58  
59  
60

Confidential

Kimberley Garbedian MD  
Department of Obstetrics and Gynecology, Mount Sinai Hospital, University of Toronto

Miranda Boggild  
University of Toronto

Joel Moody MD  
Samuel Lunenfeld Research Institute, Mount Sinai Hospital

Kimberly Liu MD  
Department of Obstetrics and Gynecology, Mount Sinai Hospital, University of Toronto

1  
2  
3  
4  
5  
6  
7  
8  
9  
10  
11  
12  
13  
14  
15  
16  
17  
18  
19  
20  
21  
22  
23  
24  
25  
26  
27  
28  
29  
30  
31  
32  
33  
34  
35  
36  
37  
38  
39  
40  
41  
42  
43  
44  
45  
46  
47  
48  
49  
50  
51  
52  
53  
54  
55  
56  
57  
58  
59  
60

## **Introduction**

Infertility is a common problem affecting 15% of North American couples. Recent studies support a role for vitamin D in human reproduction, and have suggested that follicular fluid vitamin D levels predict reproductive success following *in vitro* fertilization (IVF) (1,2).

Vitamin D is a prohormone, acquired exogenously from the diet or produced endogenously in the skin. Vitamin D is primarily metabolized in the liver to 25 OH-D, serum concentrations of which are used as an indicator of vitamin D status. Vitamin D has a known role in calcium-phosphate homeostasis and bone mineralization (3). Recently, vitamin D has been linked to a variety of disease processes, such as autoimmunity, malignancy, and infertility (1,3,4). Classifications of vitamin D status vary in the literature (1,3,4). A recent Canadian guideline defined vitamin D deficiency (<25 nmol/L), insufficiency (25-74 nmol/L), and sufficiency ( $\geq 75$  nmol/L) (5). The benefits of vitamin D for nontraditional roles, such as malignancies, impaired immune response, and fertility have been associated with 25 OH-D levels  $\geq 75$  nmol/L (1,3,4).

People living in countries at higher latitudes, such as the US and Canada, are more prone to vitamin D insufficiency, especially during winter months (6). Vitamin D insufficiency is highly prevalent in reproductive age women (1,6). A Canadian study by Veith *et al.*, reported 25.6% of non-white and 14.8% of white reproductive age (18-35 y) women were vitamin D insufficient (<40 nmol/L). The Ozkan study investigating a reproductive age infertility population, found a slightly higher prevalence of vitamin D insufficiency (50-74 nmol/L) of 36% and deficiency (<50 nmol/L) of 27% (1). Anifandis *et al.*, reported a higher prevalence of 79% vitamin D insufficiency/deficiency in their reproductive age infertility population (7).

1  
2  
3  
4 The link between vitamin D and reproduction has been largely demonstrated in murine models  
5  
6 (8,9,10,11). In an early study by Halloran and Deluca, female rats were fed vitamin D sufficient or  
7  
8 vitamin D deficient diets and then mated. They found that vitamin D deficiency reduced overall  
9  
10 fertility by 75% and diminished litter sizes by 30% (8). These results were supported by studies by  
11  
12 Hickey *et al.*, in which female rats fed vitamin D deplete diets prior to mating had significantly smaller  
13  
14 litter sizes (9).  
15  
16  
17  
18  
19  
20  
21

22 Further evidence supporting the association between vitamin D and reproduction comes from studies  
23  
24 on the vitamin D receptor (VDR) (11,12,13). VDRs have been found in various reproductive tissues  
25  
26 including, the ovary and uterus (11,12,14 ). Studies by Yoshizawa *et al*, observed normal growth and  
27  
28 development in VDR-deficient mice before weaning (analogous to human puberty); however, after  
29  
30 weaning they failed to thrive and exhibited infertility (11). Vitamin D has also been shown to regulate  
31  
32 HOX gene expression in the uterus (12,13). Vitamin D and HOX genes, specifically transcription  
33  
34 factors HOXA10/11, are hypothesized to function as part of endocrine signal transduction pathway,  
35  
36 regulating endometrial development in preparation for implantation (12,13). Various reproductive  
37  
38 tissues, including the ovaries, fallopian tubes, endometrial stromal and decidual cells, express the  
39  
40 essential components of the vitamin D-VDR pathway and therefore are capable of responding to  
41  
42 vitamin D signaling (12,13).  
43  
44  
45  
46  
47  
48  
49

50 There are four studies in the literature looking at the impact of vitamin D deficiency on reproductive  
51  
52 success following IVF in human, with conflicting results (1, 2, 7,15). The original study by Ozkan *et*  
53  
54 *al*, was a prospective cohort study that measured the follicular fluid (FF) 25 OH-D levels in 84 women.  
55  
56 They found that women with higher vitamin D levels in their FF were significantly more likely to  
57  
58  
59  
60

1 achieve implantation and clinical pregnancy following IVF. (1) A subsequent retrospective analysis of  
2  
3 vitamin D levels in donor-recipient cycles by Rudick *et al.* also demonstrated that vitamin D  
4  
5 insufficiency in donor-oocyte recipients was associated with lower clinical pregnancy rates (2).  
6  
7  
8 Conversely, a small prospective study by Aleyasin *et al.* did not show a significant difference in  
9  
10 biochemical or clinical pregnancy rates across tertiles of FF 25 OH-D ( $p=0.959$ ,  $0.995$  and  $0.604$ ,  
11  
12 respectively) (15). Lastly, a prospective cohort study by Anifandis *et al.* suggested that excess  
13  
14 follicular fluid 25 OH-D levels in combination with decreased follicular fluid glucose levels may have  
15  
16 a negative impact on IVF success. Specifically, the clinical pregnancy rates in the deficient,  
17  
18 insufficient and sufficient groups were 32.3%, 32.7%, and 14.5%, respectively ( $p=0.047$ ) (7).  
19  
20  
21  
22  
23  
24

25 The goal of the proposed study is to determine whether serum 25 OH-D levels in infertile women are  
26  
27 predictive of in IVF outcomes. The main objective was to investigate whether vitamin D deficiency in  
28  
29 our infertile population is associated with lower implantation and lower clinical pregnancy rates after  
30  
31 IVF.  
32  
33  
34

### 35 **MATERIALS AND METHODS**

36  
37  
38 This study was conducted at an academic hospital-based fertility centre. Women undergoing IVF for  
39  
40 any indication were eligible for the study. The inclusion criteria were; age  $\geq 18$ , age  $\leq 41$ , baseline day  
41  
42 3 FSH  $\leq 12$  and ability to provide informed consent. The exclusion criteria were 3<sup>rd</sup> party reproduction  
43  
44 cycles, known uncorrected congenital or acquired uterine anomalies and inability to provide informed  
45  
46 consent. One hundred and seventy-three patients meeting our inclusion criteria were recruited at Mount  
47  
48 Sinai Hospital between April 2011 and November 2011. The study was approved by our institution's  
49  
50 Research Ethics Board and informed written consent was obtained from all participants.  
51  
52  
53  
54  
55  
56  
57  
58  
59  
60

1 Recruited patients underwent IVF cycles per standard clinical care. Standard agonist and antagonist  
2  
3 IVF protocols were employed. Agonist protocols used Buserelin Acetate (Suprefact; Sanofi Aventis,  
4  
5 Canada) starting in midluteal phase at a dose of 0.5 mg/day SC for long protocols or at start of the  
6  
7 cycle for microdose flare protocols. Antagonist cycles used Cetrolix acetate (Cetrotide; EMD Serono,  
8  
9 Canada) or Ganirelix acetate (Merk, Canada), started as per flexible start protocol, when estradiol (E<sub>2</sub>)  
10  
11 levels were  $\geq 2000$  nmol/L or dominant follicle size was  $\geq 14$ mm. Recombinant or urine purified FSH,  
12  
13 with or without LH or HMG, was used for controlled ovarian hyperstimulation; starting doses were  
14  
15 determined prior to study recruitment based on age, early follicular phase FSH, and number of antral  
16  
17 follicles. Individualized step-down or step-up protocols were instituted when clinically indicated.  
18  
19 Ovarian response was assessed by serial transvaginal ultrasound and serum LH and E<sub>2</sub> assays. Serum  
20  
21 25 OH-D samples were collected prior to oocyte retrieval. Nuclear maturation was triggered with  
22  
23 10,000 IU of hCG (Merk, Canada) when 3 or more dominant follicles  $\geq 17$  mm were achieved.  
24  
25 Transvaginal ultrasound guided oocyte retrieval was performed 36-38 hours following hCG injection.  
26  
27 Ultrasound-guided fresh embryo transfer was performed on day 3 or 5 post fertilization. Vaginal  
28  
29 micronized progesterone suppositories (Abbott, Canada) were used for luteal phase support and were  
30  
31 continued until documentation of fetal cardiac activity. Clinical pregnancy (CP) was defined as an  
32  
33 intrauterine sac visible on ultrasound.  
34  
35  
36  
37  
38  
39  
40  
41  
42  
43

44 Patient's demographic data and IVF cycle data was obtained via chart review. Primary outcome was  
45  
46 clinical pregnancy rate per cycle start in vitamin D deficient versus vitamin D sufficient women.  
47  
48

49 Secondary outcomes included the prevalence of vitamin D deficiency in this infertility population and  
50  
51 the effect of vitamin D on IVF cycle parameters including number of oocytes and implantation rate.  
52  
53  
54  
55

### 56 ***Statistical Analysis***

57  
58  
59  
60

1 Patients were divided into 2 groups based on 25 OH-D levels: Sufficient ( $\geq 75$  nmol/L), insufficient  
2 (<75 nmol/L). Continuous variables were reported as mean +/- SD and categorical variables were  
3 reported as a percentage (%). Chi-square analysis and Students t test or Mann-Whitney U as  
4 appropriate were used to analyze categorical and continuous variables, respectively. Serum 25 OH-D  
5 tertiles were computed (Low 46.07 +/- 11.9, Middle 70.91 +/- 6.2, Highest 101.07 +/- 17.0).  
6  
7  
8  
9  
10  
11  
12  
13  
14  
15  
16  
17  
18  
19  
20  
21  
22  
23  
24  
25  
26  
27  
28  
29  
30  
31  
32  
33  
34  
35  
36  
37  
38  
39  
40  
41  
42  
43  
44  
45  
46  
47  
48  
49  
50  
51  
52  
53  
54  
55  
56  
57  
58  
59  
60

Multivariable logistic regression analysis was used to evaluate the relationship between serum 25 OH-D and implantation and clinical pregnancy after adjusting for parameters known to influence success of an IVF cycle (age, BMI, day 5 ET). Sample size (n=170) was calculated using a power of 0.8, a level of significance of 0.05, and a 95% confidence interval. Clinical pregnancy rates are expected to be 40% in vitamin D sufficient patients and 20% in vitamin D insufficient and deficient patients, as determined by our institutions clinical pregnancy rates and results from clinical pregnancy rates in vitamin D-IVF populations (1). All data analyses were performed using IBM SPSS Statistics version 19.0.

## **Results**

One hundred and eighty two patients were recruited. One hundred and seventy three patients were included in the analysis. Nine patients did not meet our inclusion criteria and were excluded from the study. Four were > 41 years old and five did not start an IVF cycle and were excluded from the study. All 173 patients included in the study underwent oocyte retrieval and 162 had an embryo transfer (ET). Of the 11 patients that didn't have an ET, 4 patients did not have oocytes or embryo of sufficient quality and 7 had their embryos frozen secondary to ovarian hyperstimulation syndrome (OHSS) (n=3), fertility preservation (n=1), hydrosalpinx (n=1), no sperm available (n=1), and inappropriate endometrial lining (n=1). There was no trend observed in the distribution of these numbers between insufficient/deficient and sufficient groups.

1  
2  
3  
4 The prevalence of vitamin D deficiency, insufficiency, and sufficiency was 1.2%, 53.8%, and 45.1%  
5  
6 respectively. Patients were divided into two groups for analysis based on 25 OH-D levels: sufficient  
7  
8 ( $\geq 75$  nmol/L,  $\geq 30$  ng/L) and insufficient/deficient ( $< 75$  nmol/L,  $< 30$  ng/L). The Vitamin D deficient  
9  
10 and insufficient groups were combined due to the small participant number in the deficient group  
11  
12 (n=2).  
13  
14  
15  
16  
17

18 Patient characteristics were compared between serum 25-OH D groups (Table 1). BMI ( $\text{kg}/\text{m}^2$ ) was  
19  
20 significantly higher in the vitamin D insufficient/deficient group ( $24.83 \text{ kg}/\text{m}^2 \pm 4.65$ ) in comparison  
21  
22 to the sufficient group ( $23.32 \text{ kg}/\text{m}^2 \pm 3.80$ ,  $p=0.023$ ). The remaining patient characteristics did not  
23  
24 differ significantly between groups. Table 2 shows the IVF cycle parameters for the two groups. The  
25  
26 sufficient group had significantly more day 5 embryo transfers (71.8%) in comparison to the  
27  
28 insufficient/deficient group (57.9%,  $p=0.04$ ). There was no difference in number of oocytes retrieved,  
29  
30 % of cycle with intracytoplasmic sperm injection (ICSI) and number of embryos implanted.  
31  
32  
33  
34  
35  
36

37 The main outcomes measures were implantation rate and clinical pregnancy rate (per cycle start and  
38  
39 per ET) (Table 2). A significant increase in clinical pregnancy rate per cycle start was seen in the  
40  
41 sufficient (52.5%) group in comparison to the insufficient/deficient group (34.7%,  $p < 0.0001$ ).  
42  
43

44 Similarly, a significant increase in clinical pregnancy rate per ET was seen in the sufficient group  
45  
46 (54.7% vs. 37.9%,  $p < 0.0001$ ). Although implantation rate was higher in the sufficient group in  
47  
48 comparison to the insufficient/deficient group (34.5% vs. 25.6%), this was not statistically significant  
49  
50 ( $p=0.62$ ). Increasing clinical pregnancy rates were observed across serum 25-OH D tertiles (Low 46.07  
51  
52  $\pm 11.9$ , Middle 70.91  $\pm 6.2$ , Highest 101.07  $\pm 17.0$ ,  $p < 0.0001$ ) (Figure 1). Multivariable logistic  
53  
54 regression analysis confirmed serum 25 OH-D levels as an independent predictor of success of an IVF  
55  
56 cycle; adjusting for age, BMI, and day 5 ET (Table 3;  $p=0.05$ ).  
57  
58  
59  
60

## Interpretation

Vitamin D, as determined by serum 25 OH-D levels, was predictive of IVF outcomes in our cohort of infertile women. Infertile women with sufficient vitamin D levels had significantly higher clinical pregnancy rates following IVF. This finding is clinically significant and may hold potential therapeutic implications, as 54.9% of women in our study were vitamin D insufficient/deficient.

The prevalence of vitamin D deficiency (<25 nmol/L), insufficiency (25-74 nmol/L) and sufficiency (>75 nmol/L) in our population was 1.2%, 53.8%, and 45.1% respectively. These numbers are similar to previously aforementioned North American prevalence data in reproductive age women (6). The Ozkan study investigating a reproductive age infertility population, found a slightly higher prevalence of vitamin D insufficiency (50-74 nmol/L) of 36% and deficiency (<50 nmol/L) of 27% (1). Our study had a very low prevalence of vitamin D deficiency (<25nmol/L) of 1.2%. Explanations for this finding include: a difference in our deficiency definitions, the majority of our patients were taking prenatal vitamins (400 IU of vitamin D) and that our study did not extend over winter months. However, the percentage of insufficient/deficient vs. sufficient women in our study did not significantly differ in the spring, summer or fall months or with respect to race (Table 1).

BMI in the insufficient group (24.8 kg/m<sup>2</sup> + 4.7) was significantly higher than in the sufficient group (23.3 kg/m<sup>2</sup> +/- 3.8, p=0.02). This association is consistent with existing knowledge on vitamin D metabolism and has been reported in the literature (16). Specifically, Vitamin D is a fat soluble vitamin and adipose tissue is hypothesized to act as a reservoir for its storage, reducing its bioavailability (16). Lagunova *et al.* found a significant decrease in serum 25 OH-D levels in women with increasing BMI. The prevalence of vitamin D deficiency (≤50 nmol/L) was highest in individuals with BMI ≥40.



1 The mechanism by which vitamin D impacts fertility is unclear. Postulated mechanisms include its  
2  
3 effect on ovarian steroidogenesis and implantation (1,2,7,12,13). No significant difference was seen  
4  
5 between sufficient and insufficient/deficient groups with respect to IVF cycle parameters including:  
6  
7 day of HCG, gonadotropin dose, peak E<sub>2</sub>, endometrial thickness, oocytes number, or number of  
8  
9 embryos transferred. Therefore, it is unlikely that the difference observed in clinical pregnancy rates  
10  
11 was due to a difference in ovarian steroidogenesis between groups. The implantation rate was higher in  
12  
13 the sufficient group, but not statistically significant (p=0.62), however, the clinical pregnancy rate per  
14  
15 embryo transfer was (p<0.0001). A possible explanation may be that we lacked power to detect a  
16  
17 difference in implantation rate. We did, however, observe that women with sufficient vitamin D status  
18  
19 were significantly more likely to have a day 5 ET. At our institution, the decision between a day 3 and  
20  
21 day 5 ET is made on the basis of embryo quality. Therefore, the difference in clinical pregnancy rates  
22  
23 between insufficient/deficient groups may be related to improved embryo quality in the sufficient  
24  
25 group. These results are in contrast to Anifandis *et al.*, which found higher clinical pregnancy rate in  
26  
27 their deficient/insufficient group, suggesting that excess follicular fluid vitamin D may negatively  
28  
29 impact IVF success. Their mean score of embryo quality (MSEQ), but not their Cumulative Embryo  
30  
31 Score (CES) was significantly lower in the vitamin D sufficient groups in comparison to the  
32  
33 insufficient/deficient groups (p<0.05). (7) Our prospective study is larger than the previously cited  
34  
35 studies on Vitamin D and IVF outcomes and focuses on serum (not follicular) vitamin D levels and  
36  
37 IVF outcomes.  
38  
39  
40  
41  
42  
43  
44  
45  
46  
47  
48

49 Although, BMI and number of day 5 ET was significantly different between vitamin D groups, only  
50  
51 serum 25 OH-D levels proved to be an independent predictor of IVF success after multivariate logistic  
52  
53 regression analysis. Therefore, future studies should focus on determining the mechanism by which  
54  
55 vitamin D impacts clinical pregnancy, including an emphasis on measures of embryo quality,  
56  
57  
58  
59  
60

1  
2  
3  
4  
5  
6  
7  
8  
9  
10  
11  
12  
13  
14  
15  
16  
17  
18  
19  
20  
21  
22  
23  
24  
25  
26  
27  
28  
29  
30  
31  
32  
33  
34  
35  
36  
37  
38  
39  
40  
41  
42  
43  
44  
45  
46  
47  
48  
49  
50  
51  
52  
53  
54  
55  
56  
57  
58  
59  
60

implantation and uterine receptively. Studies should also be undertaken to investigate whether vitamin D supplementation can improve pregnancy rates following IVF.

Our findings suggest that women with sufficient vitamin D levels are significantly more likely to achieve clinical pregnancy following IVF. Therefore, vitamin D supplementation could provide an easy and cost effective means of improving pregnancy rates and merits further investigation. There was a high prevalence of vitamin D insufficiency/deficiency in our infertility population. Therefore, there may be a benefit assessment of vitamin D status as part of routine infertility assessment and prior to ART treatment, especially in women with higher BMI.

Confidential

## References

1. Ozkan S, Jindal SD, Greenesid K, Shu J, Gohar Z, Hickmon C, Pal L. Replete vitamin D stores predict reproductive success following in vitro fertilization. *Fertil Steril* 2010; 94(4):1314-1319.
2. Rudick B, Ingles SA, Stanczyk K, Chung R, Paulson R, Bendikson K. The role of Vitamin D Levels on IVF Outcomes in Donor-Recipient Cycles. *Fertil Steril* 2011; 95(4) S8.
3. Holick MF. Vitamin deficiency: Review. *New Engl J Med* 2007; 357: 266-281.
4. Bikle DD. Vitamin D: newly discovered actions require reconsideration of physiological requirements. *2012 21(6): 375-384.*
5. Hanley DA, Cranney A, Jones G, Whiting SJ, Leslie WD, Cole DEC, Atkinson SA, Josse RG, Feldman S, Kline GA, Rosen C. Vitamin D in adult health and disease: a review and guideline statement from Osteoporosis Canada. *Can Med Assoc J* 2010; 182(12): E610-E15.
6. Vieth R, Cole DE, Hawker GA, Trang HM, Rubin LA. Wintertime vitamin D insufficiency is common in young Canadian women, and their vitamin D intake does not prevent it. *Eur J Clin Nutr* 2001; 55(12): 1091-1097.
7. Anifandis GM, Dafopoulos K, Messini CI, Chalvatzas N, Liakos N, Pournaras S, Messinis IE. Prognostic value of follicular fluid 25-OH vitamin D and glucose levels in the IVF outcome. *Repro Biol Endo* 2010; 8(91): 1-5.
8. Halloran BP, DeLuca HF. Effect of vitamin D deficiency on fertility and reproductive capacity in the female rat. *J Nutr* 1980; 110(8): 1573-1580.
9. Hickie JP, Lavigne DM, Woodward WD. Reduced fecundity of vitamin D deficient rats. *Comp Biochem Physiol* 1983; 74(4): 923-925.
10. Kwiecinski GC, Petrie GI, DeLuca HF. 1,25-Dihydroxyvitamin D<sub>3</sub> restores fertility of vitamin D-deficient female rats. *Am J Physiol* 1989; 256(4): E483-E487.
11. Yoshizawa T, Handa Y, Uematsu Y, Takeda S, Sekine K, Yoshihara Y, Kawakami T, Arioka K, Sato H, Uchiyama Y, Masushige S, Fukamizu A, Matsumoto T, Kato S. Mice lacking the vitamin D receptor exhibit impaired bone formation, uterine hypoplasia and growth retardation after weaning. *Nat Genet* 1997; 16(4): 391-396.
12. Draftary GS, Taylor HS. Endocrine regulation of HOX genes. *Endo Rev* 2006; 27(4): 331-355.
13. Draftary GS, Taylor HS. Implantation in the human: the role of HOX genes. *Semin Reprod Med* 2000; 18(3): 311-320.
14. Kinuta K, Tanaka H, Moriwake T, Aya K, Kato S, Seino Y. Vitamin D is an important factor in estrogen biosynthesis of both female and male gonads. *Endocrinology* 2000; 141: 1317-24.

1  
2  
3  
4  
5  
6  
7  
8  
9  
10  
11  
12  
13  
14  
15  
16  
17  
18  
19  
20  
21  
22  
23  
24  
25  
26  
27  
28  
29  
30  
31  
32  
33  
34  
35  
36  
37  
38  
39  
40  
41  
42  
43  
44  
45  
46  
47  
48  
49  
50  
51  
52  
53  
54  
55  
56  
57  
58  
59  
60

15. Aleyasin A, Hosseini MA, Mahdavi A, Safdarian L, Fallahi P, Mohajeri MR, Abbasi M, Esfahani F. Predictive value of the level of vitamin D in follicular fluid on the outcome of assisted reproductive technology. *Eur J Obstet Gyn R B* 2011; 159: 132-137.

16. Lagunova Z, Porojnicu AC, Lindberg F, Hexeberg S, Moan J. The dependency of vitamin D status on body mass index, gender, age and season. *Anticancer Res* 2009; 29(9): 3713-3720.

Confidential

1  
2  
3  
4  
5  
6  
7  
8  
9  
10  
11  
12  
13  
14  
15  
16  
17  
18  
19  
20  
21  
22  
23  
24  
25  
26  
27  
28  
29  
30  
31  
32  
33  
34  
35  
36  
37  
38  
39  
40  
41  
42  
43  
44  
45  
46  
47  
48  
49  
50  
51  
52  
53  
54  
55  
56  
57  
58  
59  
60

### Figure Legend

Figure 1: Increasing clinical pregnancy rates in infertile women undergoing IVF across serum 25-OH D tertiles: Low 46.07 +/- 11.9, Middle 70.91 +/- 6.2, Highest 101.07 +/- 17.0 (p<0.0001).

Confidential

1  
2  
3  
4  
5  
6  
7  
8  
9  
10  
11  
12  
13  
14  
15  
16  
17  
18  
19  
20  
21  
22  
23  
24  
25  
26  
27  
28  
29  
30  
31  
32  
33  
34  
35  
36  
37  
38  
39  
40  
41  
42  
43

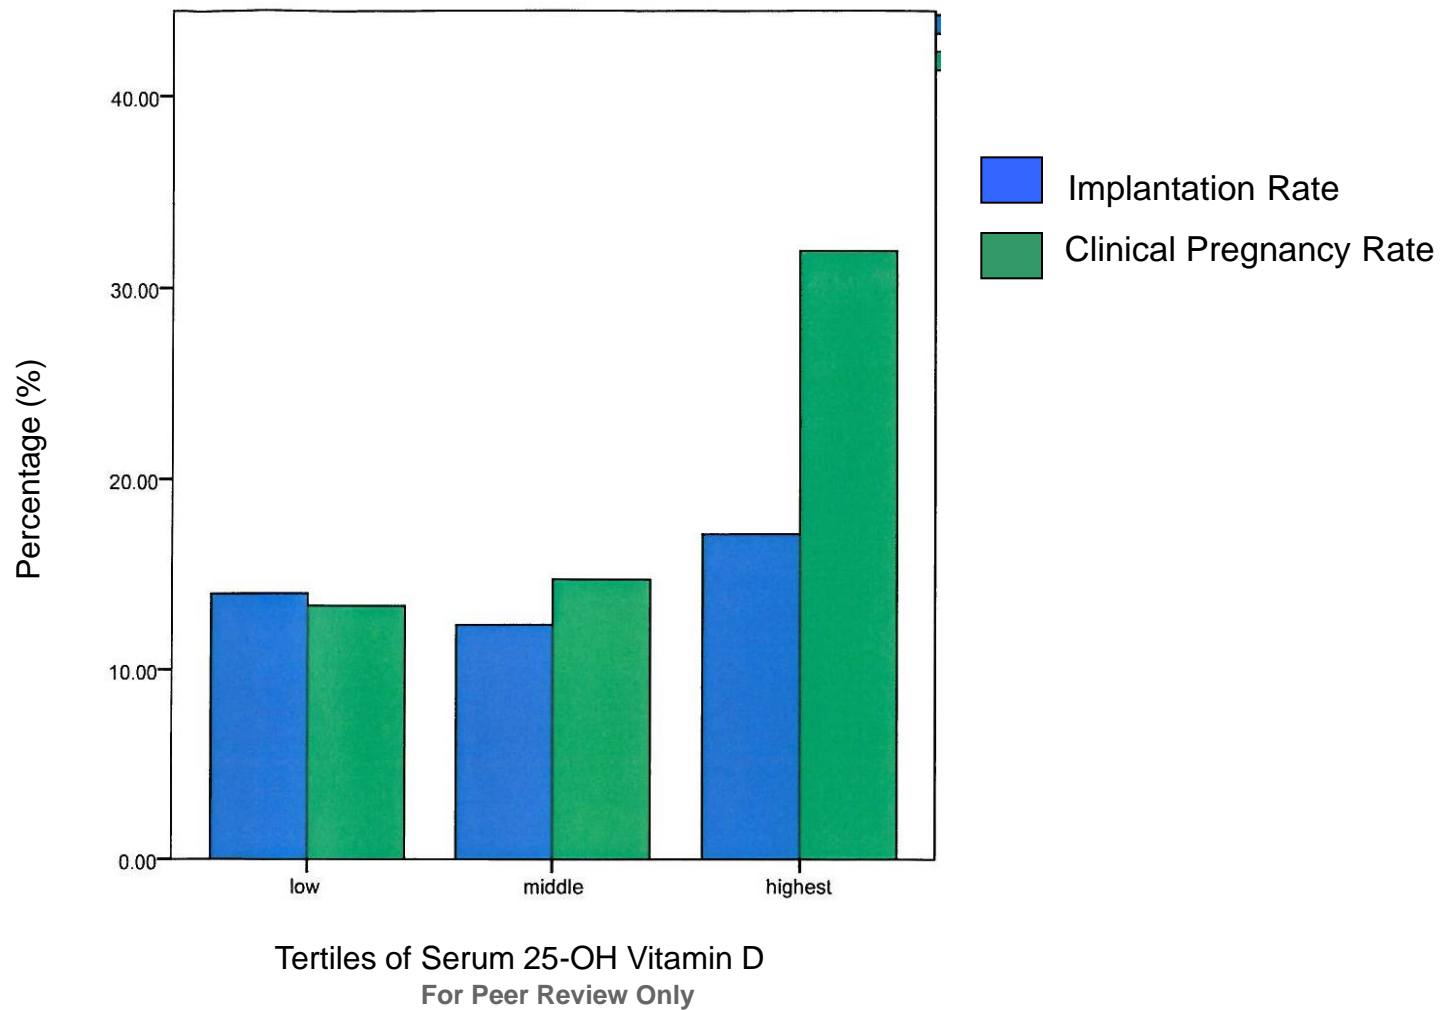

| <b>Patient Characteristics</b>      | <b>Insufficient/Deficient<br/>n=95 (54.9%)</b> | <b>Sufficient<br/>n=78 (45.1%)</b> | <b>P value</b> |
|-------------------------------------|------------------------------------------------|------------------------------------|----------------|
| <b>25 OH-D (nmol/L)</b>             | 54.5 +/- 14.0                                  | 95.5 +/- 17.8                      | <0.0001*       |
| <b>Age (y)</b>                      | 34.6 +/- 4.0                                   | 34.4 +/- 3.9                       | 0.75           |
| <b>Race</b>                         |                                                |                                    | 0.31           |
| <b>White</b>                        | 56 (58.9)                                      | 58 (74.4)                          |                |
| <b>Black</b>                        | 3 (3.2)                                        | 1 (1.3)                            |                |
| <b>Other</b>                        | 36 (37.9)                                      | 19 (24.4)                          |                |
| <b>BMI (kg/m<sup>2</sup>)</b>       | 24.8 +/- 4.7                                   | 23.3 +/- 3.8                       | 0.02*          |
| <b>Gravidy (n)</b>                  | 0.8 +/- 1.1                                    | 0.9 +/- 1.3                        | 0.60           |
| <b>Parity (n)</b>                   | 0.2 +/- 0.5                                    | 0.3 +/- 0.6                        | 0.52           |
| <b>Duration of Infertility (mo)</b> | 20.7 +/- 15.1                                  | 17.5 +/- 12.3                      | 0.14           |
| <b>Baseline FSH (mIU/ml)</b>        | 6.4 +/- 1.9                                    | 6.8 +/- 2.3                        | 0.93           |
| <b>Baseline AFC (n)</b>             | 15.9 +/- 8.4                                   | 17.7 +/- 10.3                      | 0.21           |
| <b>Previous IVF cycles (n)</b>      | 0.7 +/- 1.0                                    | 0.6 +/- 1.0                        | 0.41           |
| <b>IVF cycle season (%)</b>         |                                                |                                    | 0.79           |
| <b>Spring</b>                       | 50 (52.6)                                      | 41 (52.6)                          |                |
| <b>Summer</b>                       | 31 (32.6)                                      | 28 (35.9)                          |                |
| <b>Fall</b>                         | 14 (14.7)                                      | 9 (11.5)                           |                |

Continuous data are presented as mean +/- standard deviation

\* Statistically significant, P ≤0.05

| <b>IVF Cycle Characteristics</b>               | <b>Insufficient/Deficient<br/>n=95 (54.9%)</b> | <b>Sufficient<br/>n=78 (45.1%)</b> | <b>P value</b> |
|------------------------------------------------|------------------------------------------------|------------------------------------|----------------|
| <b>IVF Protocol (%)</b>                        |                                                |                                    | 0.08           |
| <b>Long</b>                                    | 29 (30.5)                                      | 34 (43.6)                          |                |
| <b>Antagonist</b>                              | 64 (67.4)                                      | 40 (51.3)                          |                |
| <b>Flare</b>                                   | 2 (2.1)                                        | 4 (5.1)                            |                |
| <b>Day of hCG</b>                              | 12.1 +/- 1.3                                   | 11.9 +/- 1.4                       | 0.39           |
| <b>Gonadotropin dose (IU)</b>                  | 2602.8 +/- 1287.3                              | 2547.1 +/- 1330.3                  | 0.78           |
| <b>Follicles &gt;1.4 cm (n)</b>                | 11.9 +/- 6.5                                   | 11.7 +/- 5.8                       | 0.84           |
| <b>E<sub>2</sub> day of hCG (nmol/L)</b>       | 8556.7 +/- 6187.3                              | 9776.15 +/- 5902.6                 | 0.19           |
| <b>Endometrium day of hCG (cm)</b>             | 1.0 +/- 1.6                                    | 1.0 +/- 0.2                        | 0.54           |
| <b>Oocytes retrieved (n)</b>                   | 12.6 +/- 7.4                                   | 12.7 +/- 6.6                       | 0.98           |
| <b>ICSI (%)</b>                                | 74 (77.9)                                      | 63 (80.8)                          | 0.39           |
| <b>Embryos transferred (n)</b>                 | 1.8 +/- 1.0                                    | 1.8 +/- 0.9                        | 0.93           |
| <b>Day of Transfer</b>                         |                                                |                                    |                |
| <b>Day 3</b>                                   | 31 (32.6)                                      | 19 (24.4)                          | 0.15           |
| <b>Day 5</b>                                   | 55 (57.9)                                      | 56 (71.8)                          | 0.04*          |
| <b>Implantation rate (%)</b>                   | 25.6                                           | 34.5                               | 0.62           |
| <b>Clinical pregnancy rate/cycle start (%)</b> | 34.7                                           | 52.5                               | p <0.0001*     |
| <b>Clinical pregnancy rate/ET (%)</b>          | 37.9                                           | 54.7                               | p <0.0001*     |

Note continuous data are presented as mean +/- standard deviation

\* Statistically significant, P ≤0.05



| Clinical Pregnancy       | OR (95% CI)      | P value | Adjusted OR (95% CI) | P value |
|--------------------------|------------------|---------|----------------------|---------|
| Age (y)                  | 0.96 (0.89-1.04) | 0.34    | 0.98 (0.90 -1.07)    | 0.71    |
| BMI (kg/m <sup>2</sup> ) | 0.92 (0.86-1.00) | 0.05    | 0.94 (0.87-1.01)     | 0.09    |
| Day 5 ET (n)             | 1.60 (0.85-3.04) | 0.15    | 1.34 (0.64-2.81)     | 0.44    |
| 25 OH-D nmol/L           | 1.02 (1.00-1.03) | 0.17    | 1.01 (1.00-1.03)     | 0.05*   |

\* Statistically significant,  $P \leq 0.05$

Confidential

STROBE Statement—Checklist of items that should be included in reports of *cohort studies*

|                              | Item No | Recommendation                                                                                                                                                                                                                                                                                                                                                                                                |
|------------------------------|---------|---------------------------------------------------------------------------------------------------------------------------------------------------------------------------------------------------------------------------------------------------------------------------------------------------------------------------------------------------------------------------------------------------------------|
| <b>Title and abstract</b>    | 1-√     | (a) Indicate the study's design with a commonly used term in the title or the abstract<br>(b) Provide in the abstract an informative and balanced summary of what was done and what was found                                                                                                                                                                                                                 |
| <b>Introduction</b>          |         |                                                                                                                                                                                                                                                                                                                                                                                                               |
| Background/rationale         | 2-√     | Explain the scientific background and rationale for the investigation being reported                                                                                                                                                                                                                                                                                                                          |
| Objectives                   | 3-√     | State specific objectives, including any prespecified hypotheses                                                                                                                                                                                                                                                                                                                                              |
| <b>Methods</b>               |         |                                                                                                                                                                                                                                                                                                                                                                                                               |
| Study design                 | 4-√     | Present key elements of study design early in the paper                                                                                                                                                                                                                                                                                                                                                       |
| Setting                      | 5-√     | Describe the setting, locations, and relevant dates, including periods of recruitment, exposure, follow-up, and data collection                                                                                                                                                                                                                                                                               |
| Participants                 | 6-√     | (a) Give the eligibility criteria, and the sources and methods of selection of participants. Describe methods of follow-up<br>(b) For matched studies, give matching criteria and number of exposed and unexposed                                                                                                                                                                                             |
| Variables                    | 7-√     | Clearly define all outcomes, exposures, predictors, potential confounders, and effect modifiers. Give diagnostic criteria, if applicable                                                                                                                                                                                                                                                                      |
| Data sources/<br>measurement | 8-√     | For each variable of interest, give sources of data and details of methods of assessment (measurement). Describe comparability of assessment methods if there is more than one group                                                                                                                                                                                                                          |
| Bias                         | 9-√     | Describe any efforts to address potential sources of bias                                                                                                                                                                                                                                                                                                                                                     |
| Study size                   | 10-√    | Explain how the study size was arrived at                                                                                                                                                                                                                                                                                                                                                                     |
| Quantitative variables       | 11-√    | Explain how quantitative variables were handled in the analyses. If applicable, describe which groupings were chosen and why                                                                                                                                                                                                                                                                                  |
| Statistical methods          | 12-√    | (a) Describe all statistical methods, including those used to control for confounding<br>(b) Describe any methods used to examine subgroups and interactions<br>(c) Explain how missing data were addressed<br>(d) If applicable, explain how loss to follow-up was addressed<br>(e) Describe any sensitivity analyses                                                                                        |
| <b>Results</b>               |         |                                                                                                                                                                                                                                                                                                                                                                                                               |
| Participants                 | 13-√    | (a) Report numbers of individuals at each stage of study—eg numbers potentially eligible, examined for eligibility, confirmed eligible, included in the study, completing follow-up, and analysed<br>(b) Give reasons for non-participation at each stage<br>(c) Consider use of a flow diagram                                                                                                               |
| Descriptive data             | 14-√    | (a) Give characteristics of study participants (eg demographic, clinical, social) and information on exposures and potential confounders<br>(b) Indicate number of participants with missing data for each variable of interest<br>(c) Summarise follow-up time (eg, average and total amount)                                                                                                                |
| Outcome data                 | 15-√    | Report numbers of outcome events or summary measures over time                                                                                                                                                                                                                                                                                                                                                |
| Main results                 | 16-√    | (a) Give unadjusted estimates and, if applicable, confounder-adjusted estimates and their precision (eg, 95% confidence interval). Make clear which confounders were adjusted for and why they were included<br>(b) Report category boundaries when continuous variables were categorized<br>(c) If relevant, consider translating estimates of relative risk into absolute risk for a meaningful time period |

|                          |      |                                                                                                                                                                            |
|--------------------------|------|----------------------------------------------------------------------------------------------------------------------------------------------------------------------------|
| Other analyses           | 17-√ | Report other analyses done—eg analyses of subgroups and interactions, and sensitivity analyses                                                                             |
| <b>Discussion</b>        |      |                                                                                                                                                                            |
| Key results              | 18-√ | Summarise key results with reference to study objectives                                                                                                                   |
| Limitations              | 19-√ | Discuss limitations of the study, taking into account sources of potential bias or imprecision. Discuss both direction and magnitude of any potential bias                 |
| Interpretation           | 20-√ | Give a cautious overall interpretation of results considering objectives, limitations, multiplicity of analyses, results from similar studies, and other relevant evidence |
| Generalisability         | 21-√ | Discuss the generalisability (external validity) of the study results                                                                                                      |
| <b>Other information</b> |      |                                                                                                                                                                            |
| Funding                  | 22-√ | Give the source of funding and the role of the funders for the present study and, if applicable, for the original study on which the present article is based              |

\*Give information separately for exposed and unexposed groups.

**Note:** An Explanation and Elaboration article discusses each checklist item and gives methodological background and published examples of transparent reporting. The STROBE checklist is best used in conjunction with this article (freely available on the Web sites of PLoS Medicine at <http://www.plosmedicine.org/>, Annals of Internal Medicine at <http://www.annals.org/>, and Epidemiology at <http://www.epidem.com/>). Information on the STROBE Initiative is available at <http://www.strobe-statement.org>.
